# Supplementary material
Source: PubMed Central journal article supplement (PMC2077246)

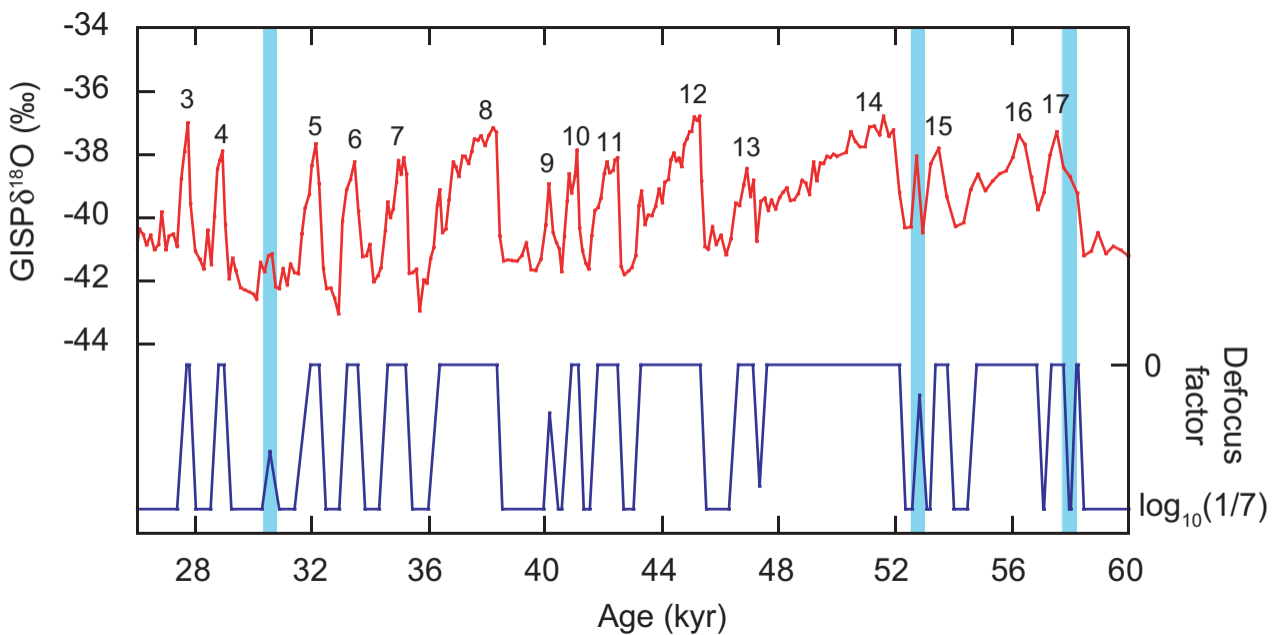

Supplement: pnas_0708494104_1.pdf [file pnas_0708494104_1.pdf]

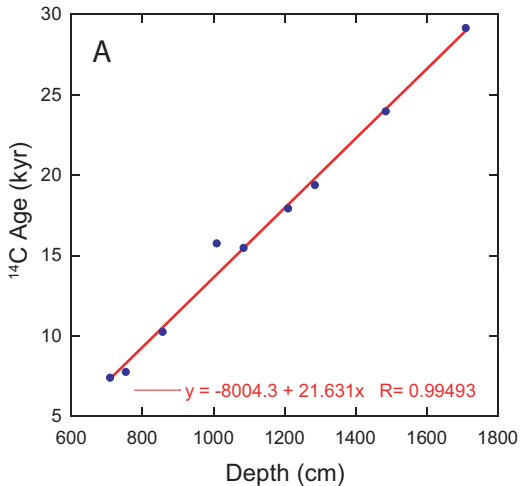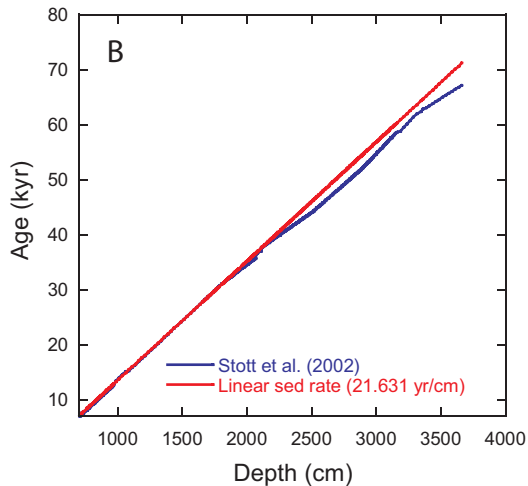

Supplement: pnas_0708494104_2.pdf [file pnas_0708494104_2.pdf]

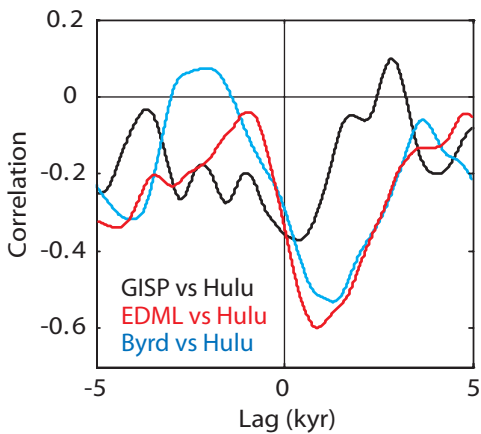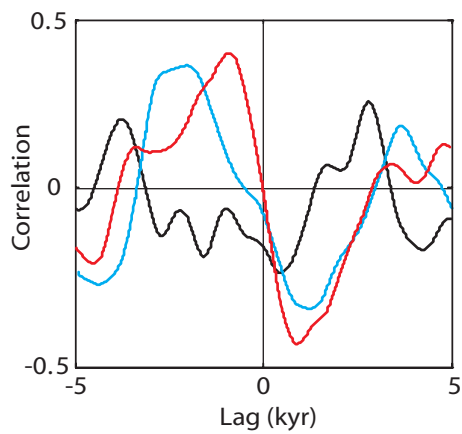

Supplement: pnas_0708494104_3.pdf [file pnas_0708494104_3.pdf]

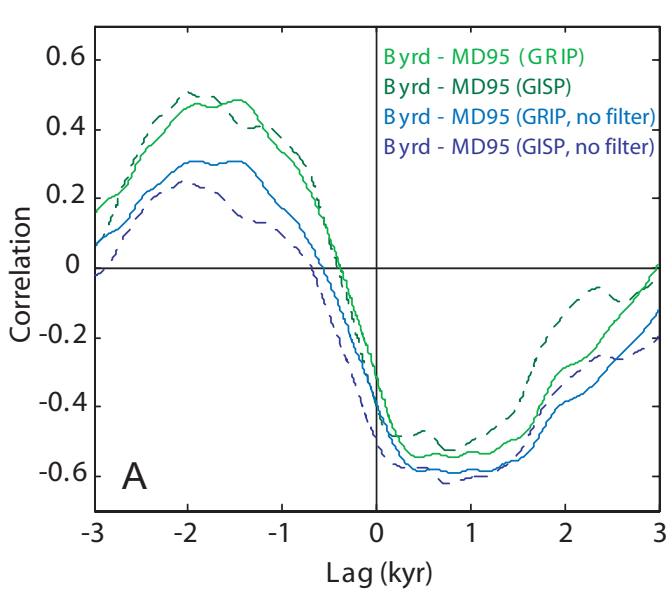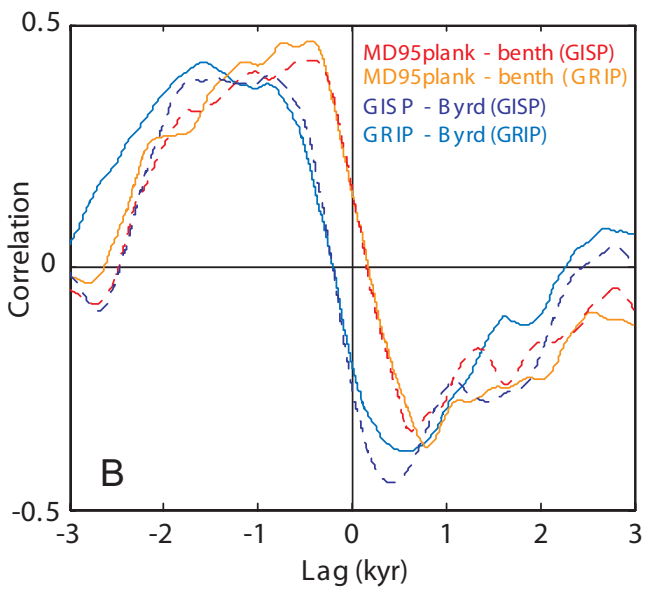

Supplement: pnas_0708494104_4.pdf [file pnas_0708494104_4.pdf]
